# Supplementary material for: Water-induced controllable synthesis of CsPbBr3 nanorods/nanocubes from CsBr nanocrystals
Source: Royal Society of Chemistry journal article supplement (doi:10.1039/d4tc02235a), 2024-01-01
Supplement: d4tc02235a1.pdf [file d4tc02235a1.pdf]

## Supporting Information

### Water-Induced Controllable Synthesis of CsPbBr<sub>3</sub> Nanorods/Nanocubes from CsBr Nanocrystals

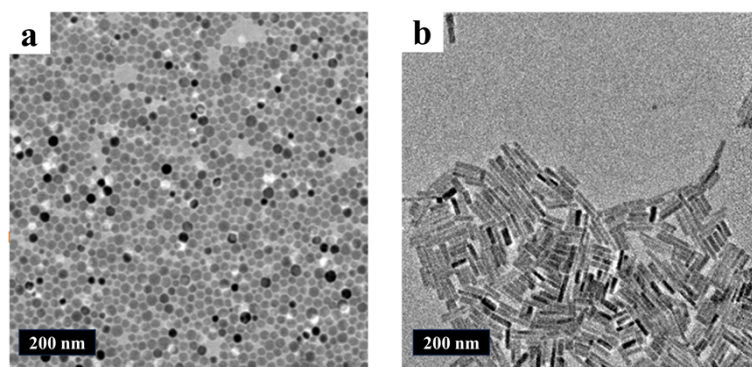

**Figure S1.** (a) The transmission electron microscope (TEM) image of CsBr nanocrystals. (b) TEM of long CsPbBr<sub>3</sub> NRs.

**Table S1.** Comparison of PL QY, average PL lifetimes ( $\tau_{PL}$ ), radiative recombination lifetimes ( $\tau_r$ ), and apparent non-radiative recombination lifetimes ( $\tau_{nr}$ ) of CsPbBr<sub>3</sub> NCs, short NRs and long NRs.

|               | PLQY | $T_{ave}(ns)$ | $T_r(ns)$ | $T_{nr}(ns)$ | $k_r(ns^{-1})$ | $k_{nr}(ns^{-1})$ |
|---------------|------|---------------|-----------|--------------|----------------|-------------------|
| Long NRs      | 22%  | 10.1          | 45.9      | 12.9         | 0.022          | 0.078             |
| Short NRs/NCs | 29%  | 12.2          | 42.1      | 17.2         | 0.024          | 0.058             |
| NCs           | 48%  | 17.6          | 36.7      | 33.84        | 0.027          | 0.029             |

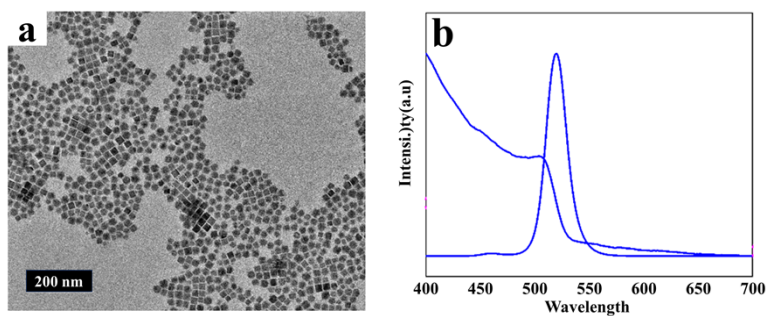

**Figure S2.** (a) TEM of CsPbBr<sub>3</sub> NCs. (b) Photoluminescence (PL) spectra and UV-visible absorption of CsPbBr<sub>3</sub> NCs in hexane solution.

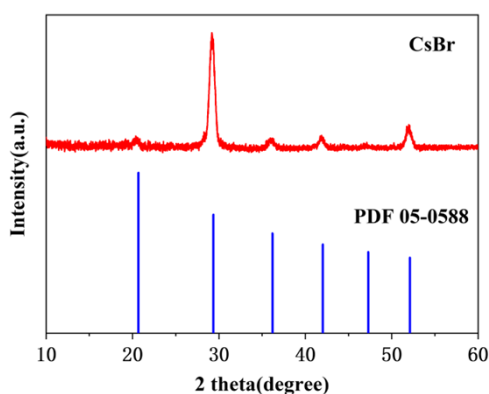

**Figure S3.** (a) X-ray diffraction (XRD) pattern of CsBr NRs.

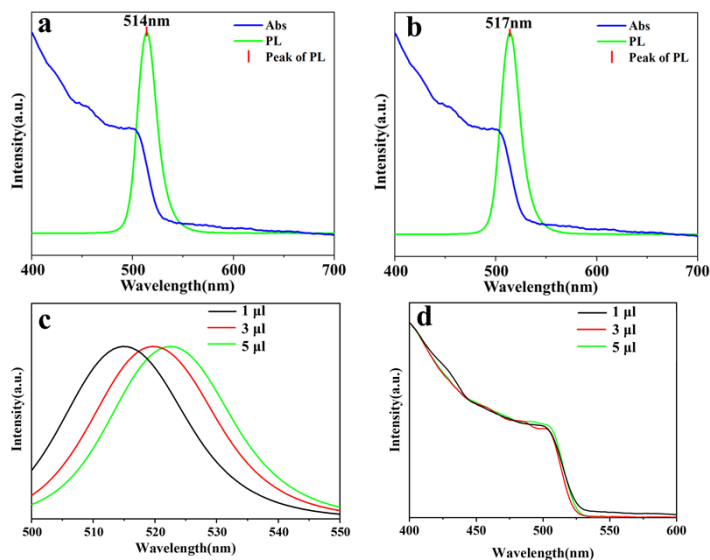

**Figure S4.** PL spectra and UV-visible absorption spectra of CsPbBr<sub>3</sub> NRs obtained with the addition of (a) 1  $\mu$ l and (b) 3  $\mu$ l water. (c) PL spectra and (d) UV-visible absorption spectra of CsPbBr<sub>3</sub> NRs obtained with the addition of different amounts of water.

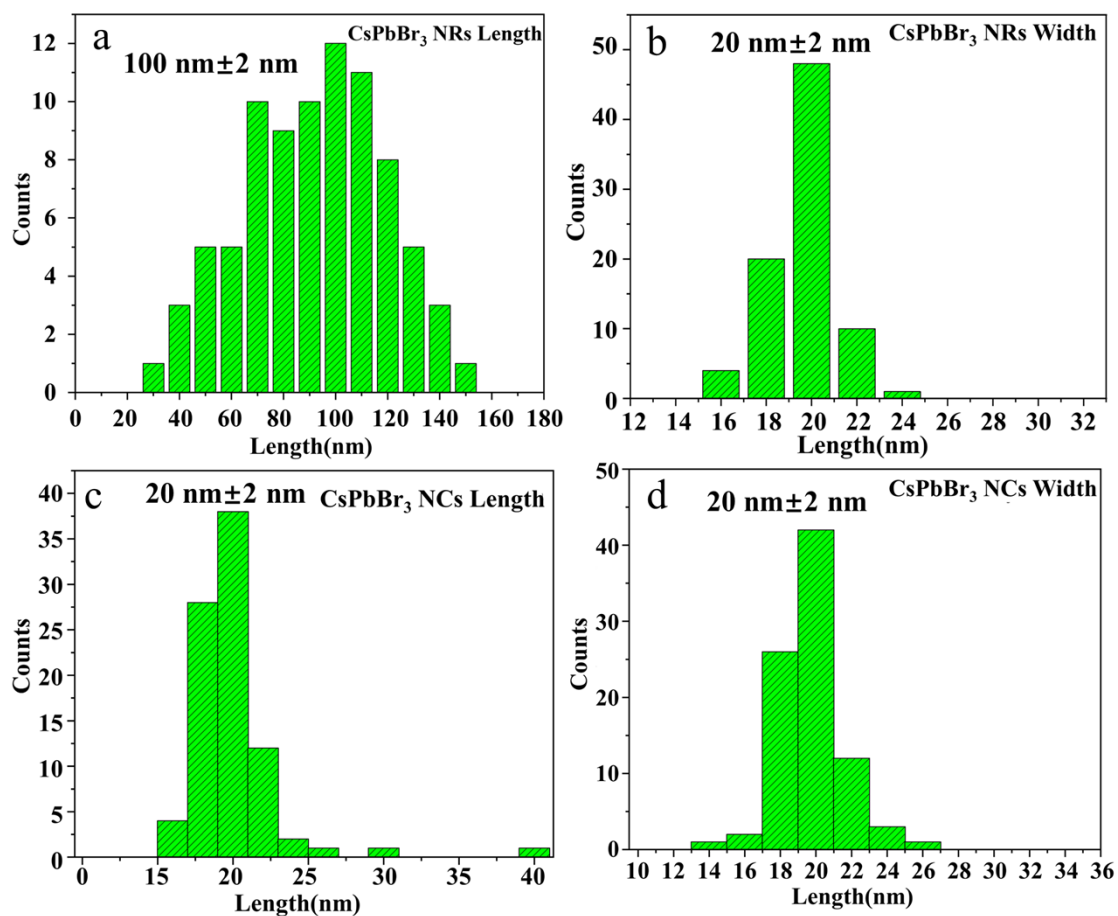

**Figure S5.** (a,b) Width and length distribution statistics of CsPbBr<sub>3</sub> NRs obtained in reactions with the addition of 5  $\mu$ l of water. (c,d) Width and length distribution statistics of CsPbBr<sub>3</sub> NRs obtained in reactions with the addition of 1  $\mu$ l of water.

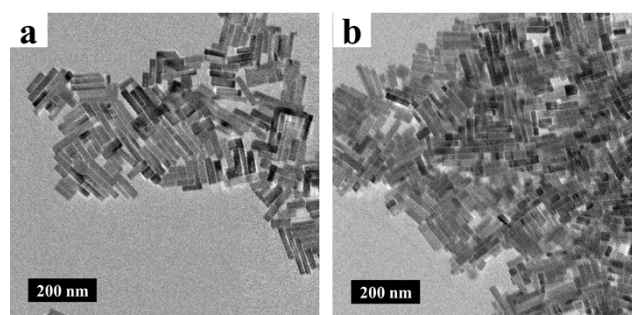

**Figure S6.** TEM images of CsPbBr<sub>3</sub> NRs obtained in reactions with the addition of 10  $\mu$ l (a) and 20  $\mu$ l of water (b).

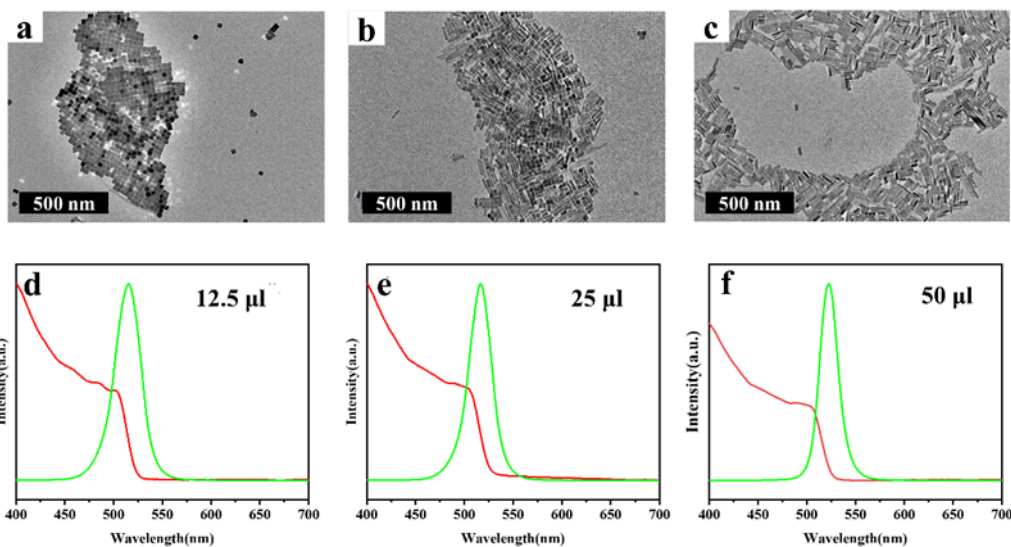

**Figure S7.** (a-c) TEM images of CsPbBr<sub>3</sub> NRs obtained by reacting with 50 μl, 25 μl, and 12.5 μl of OA and OLA. (d-f) PL spectra and UV-visible absorption spectra of CsPbBr<sub>3</sub> NRs by reacting with 50 μl, 25 μl, and 12.5 μl of OA and OLA

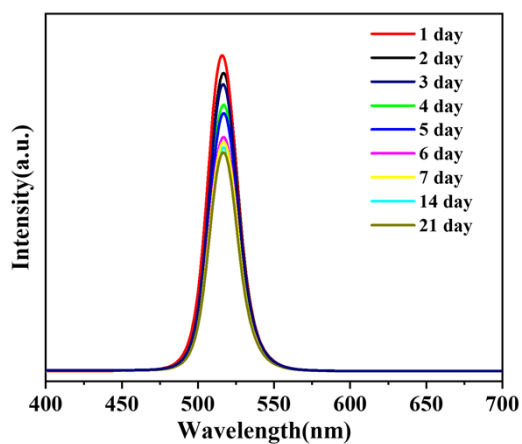

**Figure S8.** The relationship between PL intensity and storage time of CsPbBr<sub>3</sub> long NRs under ambient conditions
